# Supplementary material for: Familial Hypercholesterolemia in Premature Acute Coronary Syndrome. Insights from CholeSTEMI Registry
Source: PubMed Central journal article supplement (PMC7692119; doi:10.3390/jcm9113489), 2020-10-29
Supplement: jcm-09-03489-s001.pdf [file jcm-09-03489-s001.pdf]

Table S1: Regions covered by the NGS panel.

| Gene | Chr   | Chr Start | Chr End  | # Amplicons | Total Bases | Covered Bases | Missed Bases | Coverage (%) |
|------|-------|-----------|----------|-------------|-------------|---------------|--------------|--------------|
| APOB | chr2  | 21251194  | 21251415 | 2           | 222         | 222           | 0            | 100          |
| APOB | chr2  | 21224597  | 21226211 | 10          | 1615        | 1615          | 0            | 100          |
| APOB | chr2  | 21227947  | 21235528 | 43          | 7582        | 7582          | 0            | 100          |
| APOB | chr2  | 21250695  | 21250942 | 2           | 248         | 248           | 0            | 100          |
| APOB | chr2  | 21252765  | 21252892 | 1           | 128         | 128           | 0            | 100          |
| APOB | chr2  | 21256166  | 21256395 | 2           | 230         | 230           | 0            | 100          |
| APOB | chr2  | 21257683  | 21257778 | 1           | 96          | 96            | 0            | 100          |
| APOB | chr2  | 21227136  | 21227329 | 1           | 194         | 194           | 0            | 100          |
| APOB | chr2  | 21237940  | 21238137 | 1           | 198         | 198           | 0            | 100          |
| APOB | chr2  | 21249655  | 21249841 | 1           | 187         | 187           | 0            | 100          |
| APOB | chr2  | 21258451  | 21258585 | 1           | 135         | 135           | 0            | 100          |
| APOB | chr2  | 21259967  | 21260132 | 1           | 166         | 166           | 0            | 100          |
| APOB | chr2  | 21266731  | 21266822 | 1           | 92          | 92            | 0            | 100          |
| APOB | chr2  | 21242590  | 21242782 | 1           | 193         | 193           | 0            | 100          |
| APOB | chr2  | 21247800  | 21248001 | 1           | 202         | 202           | 0            | 100          |
| APOB | chr2  | 21260825  | 21260988 | 1           | 164         | 164           | 0            | 100          |
| APOB | chr2  | 21237315  | 21237470 | 1           | 156         | 156           | 0            | 100          |
| APOB | chr2  | 21245698  | 21245919 | 1           | 222         | 222           | 0            | 100          |
| APOB | chr2  | 21263805  | 21263960 | 1           | 156         | 156           | 0            | 100          |
| APOB | chr2  | 21265228  | 21265353 | 1           | 126         | 126           | 0            | 100          |
| APOB | chr2  | 21246392  | 21246569 | 1           | 178         | 178           | 0            | 100          |
| APOB | chr2  | 21241859  | 21241990 | 1           | 132         | 132           | 0            | 100          |
| APOB | chr2  | 21252506  | 21252662 | 1           | 157         | 157           | 0            | 100          |
| APOB | chr2  | 21255221  | 21255458 | 2           | 238         | 238           | 0            | 100          |
| APOB | chr2  | 21227428  | 21227552 | 1           | 125         | 125           | 0            | 100          |
| APOB | chr2  | 21236027  | 21236410 | 2           | 384         | 384           | 0            | 100          |
| APOB | chr2  | 21238237  | 21238422 | 1           | 186         | 186           | 0            | 100          |
| APOB | chr2  | 21239306  | 21239526 | 1           | 221         | 221           | 0            | 100          |
| APOB | chr2  | 21266380  | 21266428 | 1           | 49          | 49            | 0            | 100          |
| APOE | chr19 | 45411012  | 45411214 | 2           | 243         | 243           | 0            | 100          |
| APOE | chr19 | 45409854  | 45409929 | 2           | 116         | 116           | 0            | 100          |
| APOE | chr19 | 45409121  | 45409185 | 2           | 105         | 105           | 0            | 100          |
| APOE | chr19 | 45411785  | 45412512 | 5           | 768         | 768           | 0            | 100          |
| LDLR | chr19 | 11200220  | 11200296 | 1           | 77          | 77            | 0            | 100          |
| LDLR | chr19 | 11227530  | 11227679 | 1           | 150         | 150           | 0            | 100          |
| LDLR | chr19 | 11210894  | 11211026 | 1           | 133         | 133           | 0            | 100          |
| LDLR | chr19 | 11222185  | 11222320 | 1           | 136         | 136           | 0            | 100          |
| LDLR | chr19 | 11230763  | 11230914 | 1           | 152         | 152           | 0            | 100          |
| LDLR | chr19 | 11233845  | 11234025 | 1           | 181         | 181           | 0            | 100          |
| LDLR | chr19 | 11221323  | 11221452 | 1           | 130         | 130           | 0            | 100          |
| LDLR | chr19 | 11226765  | 11226893 | 1           | 129         | 129           | 0            | 100          |
| LDLR | chr19 | 11231041  | 11231203 | 1           | 163         | 163           | 0            | 100          |
| LDLR | chr19 | 11224206  | 11224443 | 2           | 238         | 238           | 0            | 100          |
| LDLR | chr19 | 11218063  | 11218195 | 1           | 133         | 133           | 0            | 100          |
| LDLR | chr19 | 11238679  | 11238766 | 1           | 88          | 88            | 0            | 100          |
| LDLR | chr19 | 11213335  | 11213467 | 1           | 133         | 133           | 0            | 100          |
| LDLR | chr19 | 11215891  | 11216281 | 3           | 391         | 391           | 0            | 100          |
| LDLR | chr19 | 11223949  | 11224130 | 2           | 182         | 182           | 0            | 100          |
| LDLR | chr19 | 11217236  | 11217368 | 1           | 133         | 133           | 0            | 100          |
| LDLR | chr19 | 11240184  | 11240351 | 1           | 168         | 168           | 0            | 100          |

|         |       |          |          |   |     |     |   |     |
|---------|-------|----------|----------|---|-----|-----|---|-----|
| LDLR    | chr19 | 11241952 | 11241997 | 1 | 46  | 46  | 0 | 100 |
| LIPA    | chr10 | 91005428 | 91005555 | 1 | 168 | 168 | 0 | 100 |
| LIPA    | chr10 | 90974580 | 90974823 | 2 | 284 | 284 | 0 | 100 |
| LIPA    | chr10 | 90984844 | 90984990 | 2 | 187 | 187 | 0 | 100 |
| LIPA    | chr10 | 91007290 | 91007410 | 1 | 161 | 161 | 0 | 100 |
| LIPA    | chr10 | 90982263 | 90982344 | 1 | 122 | 122 | 0 | 100 |
| LIPA    | chr10 | 90975690 | 90975771 | 1 | 122 | 122 | 0 | 100 |
| LIPA    | chr10 | 90983436 | 90983592 | 2 | 197 | 197 | 0 | 100 |
| LIPA    | chr10 | 90986647 | 90986766 | 2 | 160 | 160 | 0 | 100 |
| LIPA    | chr10 | 90987952 | 90988160 | 2 | 249 | 249 | 0 | 100 |
| LDLRAP1 | chr1  | 25889130 | 25889212 | 2 | 123 | 123 | 0 | 100 |
| LDLRAP1 | chr1  | 25870185 | 25870282 | 1 | 138 | 138 | 0 | 100 |
| LDLRAP1 | chr1  | 25881346 | 25881468 | 1 | 163 | 163 | 0 | 100 |
| LDLRAP1 | chr1  | 25891659 | 25891703 | 1 | 85  | 85  | 0 | 100 |
| LDLRAP1 | chr1  | 25893334 | 25893488 | 2 | 195 | 195 | 0 | 100 |
| LDLRAP1 | chr1  | 25890147 | 25890287 | 1 | 181 | 181 | 0 | 100 |
| LDLRAP1 | chr1  | 25880408 | 25880560 | 2 | 193 | 193 | 0 | 100 |
| LDLRAP1 | chr1  | 25883639 | 25883763 | 2 | 165 | 165 | 0 | 100 |
| LDLRAP1 | chr1  | 25889556 | 25889649 | 2 | 134 | 134 | 0 | 100 |
| PCSK9   | chr1  | 55523704 | 55523887 | 1 | 184 | 184 | 0 | 100 |
| PCSK9   | chr1  | 55525154 | 55525341 | 1 | 188 | 188 | 0 | 100 |
| PCSK9   | chr1  | 55517946 | 55518089 | 1 | 144 | 144 | 0 | 100 |
| PCSK9   | chr1  | 55518318 | 55518469 | 1 | 152 | 152 | 0 | 100 |
| PCSK9   | chr1  | 55509511 | 55509712 | 1 | 202 | 202 | 0 | 100 |
| PCSK9   | chr1  | 55521661 | 55521867 | 2 | 207 | 207 | 0 | 100 |
| PCSK9   | chr1  | 55522999 | 55523192 | 1 | 194 | 194 | 0 | 100 |
| PCSK9   | chr1  | 55527043 | 55527234 | 1 | 192 | 192 | 0 | 100 |
| PCSK9   | chr1  | 55505506 | 55505722 | 2 | 217 | 217 | 0 | 100 |
| PCSK9   | chr1  | 55512191 | 55512324 | 1 | 134 | 134 | 0 | 100 |
| PCSK9   | chr1  | 55529037 | 55529262 | 2 | 226 | 226 | 0 | 100 |
| PCSK9   | chr1  | 55524167 | 55524325 | 2 | 159 | 159 | 0 | 100 |

Table S2: Overall coverage of the main familial hypercholesterolemia associated genes.

| Gene           | Chr   | Num Exons | Num Amplicons | Total Bases | Covered Bases | Missed Bases | Overall Coverage (%) |
|----------------|-------|-----------|---------------|-------------|---------------|--------------|----------------------|
| <i>APOB</i>    | chr2  | 29        | 85            | 13982       | 13982         | 0            | 100                  |
| <i>LDLR</i>    | chr19 | 18        | 21            | 2763        | 2763          | 0            | 100                  |
| <i>PCSK9</i>   | chr1  | 12        | 16            | 2199        | 2199          | 0            | 100                  |
| <i>APOE</i>    | chr19 | 4         | 11            | 1232        | 1232          | 0            | 100                  |
| <i>LDLRAP1</i> | chr1  | 9         | 14            | 1377        | 1377          | 0            | 100                  |
| <i>LIPA</i>    | chr10 | 9         | 14            | 1650        | 1650          | 0            | 100                  |

Table S3: Clinical characteristics of the cohort.

| Patients | Smoker | DM | HBP | DL | BMI   | FH | Highest LDLc |
|----------|--------|----|-----|----|-------|----|--------------|
| Woman 1  | 1      | 0  | 0   | 0  | 30,42 | 0  | 65           |
| Woman 2  | 1      | 1  | 0   | 1  | 33,06 | 1  | 149          |
| Woman 3  | 1      | 0  | 1   | 1  | 34,95 | 0  | 150          |
| Woman 4  | 1      | 0  | 1   | 0  | 23,44 | 0  | 141          |
| Woman 5  | 1      | 0  | 0   | 0  | 24,44 | 1  | 115          |
| Woman 6  | 1      | 0  | 0   | 0  | 28,91 | 0  | 67           |
| Woman 7  | 1      | 0  | 0   | 0  | 31,22 | 1  | 97           |
| Woman 8  | 1      | 0  | 0   | 1  | 21,78 | 0  | 106          |
| Man 1    | 1      | 0  | 0   | 0  | 29,05 | 0  | 148          |
| Man 2    | 1      | 0  | 1   | 0  | 34,06 | 1  | 103          |
| Man 3    | 0      | 0  | 1   | 0  | 27,76 | 0  | 109          |
| Man 4    | 1      | 0  | 1   | 0  | 32,95 | 1  | 188          |
| Man 5    | 0      | 0  | 0   | 0  | 26,3  | 1  | 98           |

|        |   |   |   |   |       |   |     |
|--------|---|---|---|---|-------|---|-----|
| Man 6  | 1 | 0 | 0 | 0 | 33,53 | 0 | 136 |
| Man 7  | 1 | 0 | 1 | 1 | 32,79 | 0 | 115 |
| Man 8  | 1 | 1 | 1 | 1 | 33,24 | 1 | 217 |
| Man 9  | 0 | 0 | 0 | 1 | 27,04 | 0 | 179 |
| Man 10 | 1 | 1 | 1 | 0 | 27,76 | 0 | 79  |
| Man 11 | 1 | 0 | 0 | 0 | -     | 0 | 75  |
| Man 12 | 1 | 0 | 0 | 1 | 25,95 | 0 | 201 |
| Man 13 | 1 | 0 | 0 | 1 | 23,44 | 0 | 207 |
| Man 14 | 1 | 1 | 1 | 1 | 30,8  | 0 | 118 |
| Man 15 | 1 | 0 | 0 | 0 | 33,63 | 0 | 117 |
| Man 16 | 0 | 0 | 0 | 0 | 24,22 | 1 | 113 |
| Man 17 | 1 | 0 | 0 | 1 | 34,72 | 1 | 137 |
| Man 18 | 0 | 0 | 0 | 0 | 28,38 | 1 | 82  |
| Man 19 | 1 | 1 | 0 | 0 | 29,07 | 0 | 137 |
| Man 20 | 1 | 0 | 0 | 0 | 24,26 | 0 | 173 |
| Man 21 | 1 | 0 | 0 | 1 | 27,38 | 0 | 161 |
| Man 22 | 1 | 0 | 1 | 0 | 34,6  | 1 | 118 |
| Man 23 | 1 | 0 | 0 | 1 | 26,12 | 0 | 177 |
| Man 24 | 1 | 0 | 0 | 0 | 26,69 | 1 | 142 |
| Man 25 | 0 | 0 | 0 | 0 | 24,22 | 0 | 80  |
| Man 26 | 1 | 0 | 1 | 0 | 29,41 | 0 | 129 |
| Man 27 | 1 | 0 | 1 | 0 | 27,68 | 0 | 190 |
| Man 28 | 1 | 0 | 1 | 1 | 31,02 | 0 | 174 |
| Man 29 | 1 | 0 | 0 | 0 | 31,79 | 0 | 79  |
| Man 30 | 1 | 0 | 1 | 1 | 29,06 | 0 | 178 |
| Man 31 | 1 | 0 | 0 | 0 | 33,22 | 0 | 89  |
| Man 32 | 0 | 0 | 0 | 0 | 35,51 | 0 | 110 |
| Man 33 | 1 | 0 | 0 | 0 | 22,27 | 0 | 100 |
| Man 34 | 1 | 0 | 0 | 1 | 26,02 | 1 | 138 |
| Man 35 | 1 | 0 | 0 | 0 | 31,14 | 0 | 109 |
| Man 36 | 1 | 0 | 0 | 0 | 20,96 | 0 | 138 |
| Man 37 | 1 | 0 | 0 | 0 | 32,45 | 0 | 118 |
| Man 38 | 1 | 0 | 1 | 1 | 33,02 | 1 | 165 |
| Man 39 | 1 | 1 | 0 | 0 | 30,67 | 0 | 128 |
| Man 40 | 1 | 0 | 0 | 0 | 25,47 | 1 | 164 |
| Man 41 | 1 | 0 | 0 | 1 | 27,75 | 0 | 197 |
| Man 42 | 1 | 0 | 0 | 1 | 27,13 | 0 | 143 |
| Man 43 | 1 | 0 | 1 | 0 | 32,28 | 0 | 129 |
| Man 44 | 1 | 0 | 0 | 1 | 32,51 | 1 | 184 |
| Man 45 | 0 | 0 | 0 | 0 | 29,41 | 0 | 94  |
| Man 46 | 1 | 0 | 0 | 1 | 26,12 | 0 | 152 |
| Man 47 | 1 | 0 | 0 | 1 | 25,95 | 0 | 205 |
| Man 48 | 1 | 0 | 0 | 1 | 26,23 | 0 | 149 |

High blood pressure = HBP; DM = diabetes mellitus; DL = dyslipidemia; BMI = body mass index; FH = familial history of premature CVD; LDLc = LCL cholesterol; highest LDLc = highest available determination of untreated LDLc levels or corrected by lipid-lowering medication and its dose.

**Table S4: DLCN Score distribution.**

| <b>Patients</b> | <b>Clinical DLCN Score</b> | <b>Family history</b> | <b>Personal clinical history</b> | <b>Physical examination</b> | <b>LDLc punctuation</b> | <b>DNA analysis</b> |
|-----------------|----------------------------|-----------------------|----------------------------------|-----------------------------|-------------------------|---------------------|
| Woman 1         | 2                          | 0                     | 2                                | 0                           | 0                       | negative            |
| Woman 2         | 3                          | 1                     | 2                                | 0                           | 0                       | negative            |
| Woman 3         | 2                          | 0                     | 2                                | 0                           | 0                       | negative            |
| Woman 4         | 2                          | 0                     | 2                                | 0                           | 0                       | negative            |
| Woman 5         | 3                          | 1                     | 2                                | 0                           | 0                       | negative            |
| Woman 6         | 2                          | 0                     | 2                                | 0                           | 0                       | negative            |

|         |   |   |   |   |   |                      |
|---------|---|---|---|---|---|----------------------|
| Woman 7 | 3 | 1 | 2 | 0 | 0 | negative             |
| Woman 8 | 2 | 0 | 2 | 0 | 0 | negative             |
| Man 1   | 2 | 0 | 2 | 0 | 0 | negative             |
| Man 2   | 3 | 1 | 2 | 0 | 0 | negative             |
| Man 3   | 2 | 0 | 2 | 0 | 0 | negative             |
| Man 4   | 4 | 1 | 2 | 0 | 1 | negative             |
| Man 5   | 3 | 1 | 2 | 0 | 0 | APOB<br>p.Phe3150Leu |
| Man 6   | 2 | 0 | 2 | 0 | 0 | negative             |
| Man 7   | 2 | 0 | 2 | 0 | 0 | negative             |
| Man 8   | 6 | 1 | 2 | 0 | 3 | LDLR<br>p.Asp221Gly  |
| Man 9   | 3 | 0 | 2 | 0 | 1 | negative             |
| Man 10  | 4 | 0 | 2 | 0 | 0 | negative             |
| Man 11  | 2 | 0 | 2 | 0 | 0 | negative             |
| Man 12  | 5 | 0 | 2 | 0 | 3 | negative             |
| Man 13  | 5 | 0 | 2 | 0 | 3 | negative             |
| Man 14  | 2 | 0 | 2 | 0 | 0 | negative             |
| Man 15  | 2 | 0 | 2 | 0 | 0 | negative             |
| Man 16  | 3 | 1 | 2 | 0 | 0 | negative             |
| Man 17  | 3 | 1 | 2 | 0 | 0 | negative             |
| Man 18  | 3 | 1 | 2 | 0 | 0 | negative             |
| Man 19  | 2 | 0 | 2 | 0 | 0 | negative             |
| Man 20  | 3 | 0 | 2 | 0 | 1 | negative             |
| Man 21  | 3 | 0 | 2 | 0 | 1 | negative             |
| Man 22  | 4 | 1 | 2 | 0 | 0 | negative             |
| Man 23  | 3 | 0 | 2 | 0 | 1 | negative             |
| Man 24  | 3 | 1 | 2 | 0 | 0 | negative             |
| Man 25  | 2 | 0 | 2 | 0 | 0 | negative             |
| Man 26  | 2 | 0 | 2 | 0 | 0 | negative             |
| Man 27  | 5 | 0 | 2 | 0 | 3 | negative             |
| Man 28  | 3 | 0 | 2 | 0 | 1 | negative             |
| Man 29  | 2 | 0 | 2 | 0 | 0 | negative             |
| Man 30  | 3 | 0 | 2 | 0 | 1 | negative             |
| Man 31  | 3 | 0 | 2 | 0 | 0 | negative             |
| Man 32  | 2 | 0 | 2 | 0 | 0 | negative             |
| Man 33  | 4 | 0 | 2 | 0 | 0 | negative             |
| Man 34  | 3 | 1 | 2 | 0 | 0 | negative             |
| Man 35  | 2 | 0 | 2 | 0 | 0 | negative             |
| Man 36  | 2 | 0 | 2 | 0 | 0 | negative             |
| Man 37  | 2 | 0 | 2 | 0 | 0 | negative             |
| Man 38  | 4 | 1 | 2 | 0 | 1 | negative             |
| Man 39  | 2 | 0 | 2 | 0 | 0 | negative             |
| Man 40  | 4 | 1 | 2 | 0 | 1 | negative             |
| Man 41  | 5 | 0 | 2 | 0 | 3 | negative             |
| Man 42  | 2 | 0 | 2 | 0 | 0 | negative             |
| Man 43  | 2 | 0 | 2 | 0 | 0 | negative             |
| Man 44  | 4 | 1 | 2 | 0 | 1 | negative             |
| Man 45  | 2 | 0 | 2 | 0 | 0 | negative             |
| Man 46  | 2 | 0 | 2 | 0 | 0 | negative             |
| Man 47  | 5 | 0 | 2 | 0 | 3 | negative             |
| Man 48  | 2 | 0 | 2 | 0 | 0 | negative             |

DLCN= Dutch Lipid Clinic Network; LDLc= LCL cholesterol; LDLc punctuation= 155-189 mg/dL, 1 point; 190-249 mg/dL, 3 points; 250-329 mg/dL, 5 points; >329, 8 points.
